# Supplementary material for: Chronic thrombotic microangiopathy in patients with a C3 gain of function protein
Source: PubMed Central journal article supplement — Nephrol Dial Transplant. 2020 Apr 26;35(8):1449–51. doi: 10.1093/ndt/gfaa050 (PMC7462720; doi:10.1093/ndt/gfaa050), 2020-04-26
Supplement: gfaa050_supplementary_data.pdf [file gfaa050_supplementary_data.pdf]

**Supplementary data.**

**Chronic Thrombotic Microangiopathy in Patients with a C3 Gain of Function Protein: a Case Series.**

Sjoerd A.M.E.G. Timmermans,<sup>1</sup> MD, Myrurgia H. Abdul-Hamid,<sup>2</sup> MD, and Pieter van Paassen,<sup>1</sup> MD, PhD; for the Limburg Renal Registry.

<sup>1</sup>Dept. Nephrology and Clinical Immunology and <sup>2</sup>Dept. Pathology, Maastricht University Medical Center, Maastricht, the Netherlands. <sup>1</sup>Dept. Biochemistry, Cardiovascular Research Institute Maastricht, Maastricht, the Netherlands.

## **Methods S1.** Complement work-up.

Patients were screened for rare variants, i.e., variants with a minor allele frequency <1%, and single nucleotide polymorphisms in coding regions of *CFH*, *CFI*, *CD46*, *CFB*, *C3*, *CFHR1-5*, *THBD*, and *DGKE* using DNA sequencing. The classification of variants was based on international standards.<sup>1</sup> Pathogenic variants were defined as those with functional studies supporting a defect in complement regulation, including null variants in genes linked to complement regulation and/or variants that cluster in patients with primary atypical hemolytic uremic syndrome as demonstrated by Osborne *et al.*<sup>2</sup> Likely pathogenic variants were defined as those with functional studies supporting a defect in complement regulation that have been located in a mutational hotspot and/or critical functional domain. In addition, rare variants not fulfilling these criteria have been classified as uncertain significance.

The *CFH-CFHR1-5* genomic region was analyzed for rearrangements by multiplex ligation probe amplification. Factor H autoantibodies were assessed by enzyme-linked immunosorbent assay in selected cases.<sup>3</sup>

**Figure S1.** Patients with primary atypical hemolytic uremic syndrome included in the Limburg Renal Registry. Patients with chronic features of thrombotic microangiopathy on kidney biopsy not related to C3 p.R161W had a variant in *CFI* (c.452A>G, p.N151S; *n*=1), *CD46* (c.811\_816delGACAGT, p.D271\_S272del; *n*=1), or no variant (*n*=2) identified.

aHUS, atypical hemolytic uremic syndrome. FHAA, factor H autoantibodies. TMA, thrombotic microangiopathy.

| 61 patients with TMA identified              | chronic TMA/<br>kidney biopsies | acute<br>features |
|----------------------------------------------|---------------------------------|-------------------|
| ↓<br>28 patients with primary aHUS           | 11/25                           | 7/11              |
| ↓<br>17 carriers of complement variants/FHAA | 9/15                            | 5/9               |
| ↓<br>8 carriers of C3 p.R161W                | 7/7                             | 5/7               |

**Figure S2.** Morphologic features on representative kidney biopsy. Double contour formation of the glomerular basement membrane (arrowheads) and mesangiolysis were appreciated, either with thrombosis (A) or not (B); Jones methenamine silver stain, original magnification 400×. C3c (C) but not immune complex deposits were found along the glomerular basement membrane; fluorescein isothiocyanate labeled anti-C3c (Dako, Heverlee, Belgium), original magnification 400×. Electron lucent material was found in the subendothelial space (D), while electron dense deposits were lacking on electron microscopy; original magnification 1,400×.

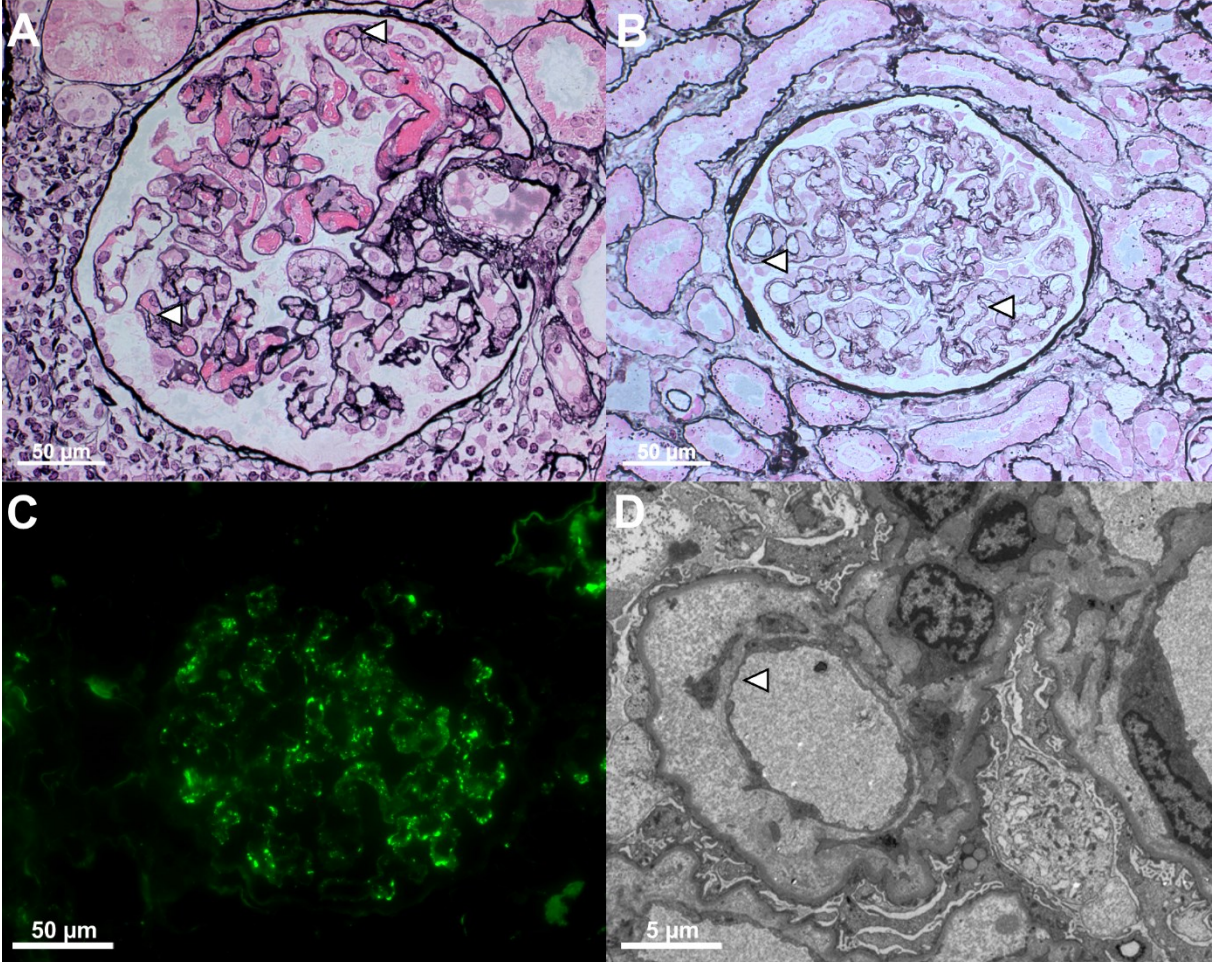

**Figure S3.** Disease course after kidney transplantation.

Arrowheads (red), recurrent aHUS. IST, immunosuppression (i.e., rituximab and steroids). T1, donor kidney 1. T2, donor kidney 2. T3, donor kidney 3. X, graft loss.

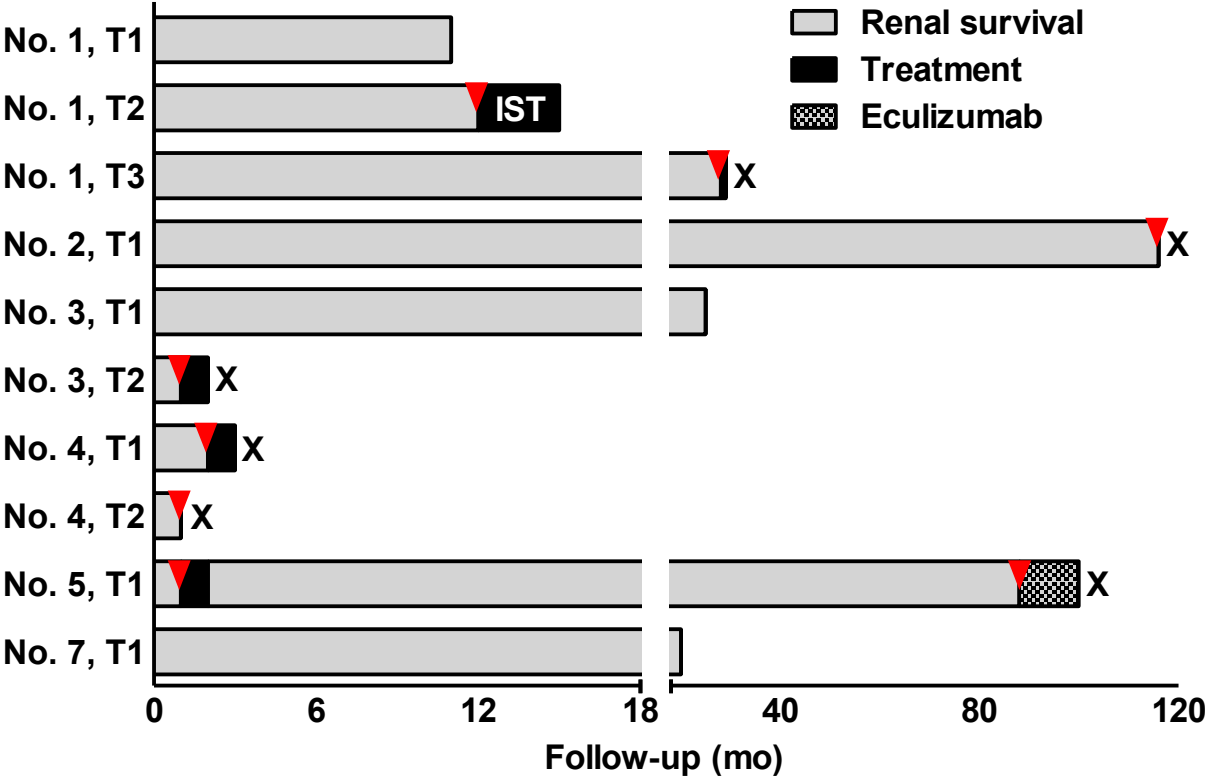

**Table S1.** Patients' characteristics at the time of recurrent primary atypical hemolytic uremic syndrome.

CMV, cytomegalovirus reactivation. DCD, donation after cardiac death. LR, living-related donation. LUR, living-unrelated donation. MAHA, microangiopathic hemolytic anemia. TAC, tacrolimus.

| <b>Patient./<br/>TX</b> | <b>Donor<br/>type</b> | <b>Platelets,<br/>G/L</b> | <b>MAHA</b> | <b>LDH,<br/>U/L</b> | <b>Creatinine,<br/>mg/dL</b> | <b>Proteinuria,<br/>g/d</b> | <b>Precipitant(s)</b> |
|-------------------------|-----------------------|---------------------------|-------------|---------------------|------------------------------|-----------------------------|-----------------------|
| No. 1/T2                | DCD                   | 334                       | –           | 366                 | 8.5                          | 5.1                         | TAC                   |
| No. 1/T3                | DCD                   | 158                       | –           | 560                 | 5.2                          | 3.7                         | TAC                   |
| No. 2/T1                | DCD                   | 205                       | –           | 159                 | 6.3                          | 3.0                         | TAC                   |
| No. 3/T2                | LR                    | 253                       | –           | 200                 | 8.7                          | Anuria                      | TAC                   |
| No. 4/T1                | DCD                   | 142                       | +           | 1,274               | 5.6                          | 1.4                         | TAC                   |
| No. 4/T2                | LUR                   | 116                       | +           | 793                 | 4.5                          | 3.3                         | TAC                   |
| No. 5/T1(1)             | LR                    | 127                       | –           | 367                 | 2.3                          | 0.5                         | TAC, CMV              |
| No. 5/T1(2)             | LR                    | 237                       | –           | 255                 | 5.5                          | 4.1                         | TAC                   |

## References

1. Richards S, Aziz N, Bale S, et al. Standards and guidelines for the interpretation of sequence variants: a joint consensus recommendation of the American College of Medical Genetics and Genomics and the Association for Molecular Pathology. *Genet Med* 2015; 17: 405-424.
2. Osborne A, Breno M, Borsa N, et al. Statistical validation of rare complement variants provides insight into the molecular basis of atypical hemolytic uremic syndrome and C3 glomerulopathy. *J Immunol* 2018; 200: 2464-2478.
3. Dragon-Durey M, Loirat C, Cloarec S, et al. Anti-factor H autoantibodies associated with atypical hemolytic uremic syndrome. *J Am Soc Nephrol* 2005; 16: 555-563.
